# Supplementary material for: Inducing nanolayers-assembly of FePtDy 1D superstructure and its induced visible light photocatalysis effect for TiO2
Source: Royal Society of Chemistry journal article supplement (doi:10.1039/c0jm00481b), 2010-01-01
Supplement: c0jm00481b.pdf [file c0jm00481b.pdf]

## **Electronic Supplementary Information**

### **Inducing Nanolayers-assembly of FePtDy 1D Superstructures and Its Induced Visible light Photocatalysis Effect for TiO<sub>2</sub>**

Fan Zhang, Ming Wen<sup>\*</sup>, Ming-zhu Cheng, Qing-sheng Wu<sup>\*</sup>, and Xiangguo Meng

Department of Chemistry, Tongji University, Siping Road 1239, Shanghai 200092, China

## 1. Synthesis of TiO<sub>2</sub> nanoparticles

Preparation of TiO<sub>2</sub> nanoparticles was carried out as following:<sup>2b</sup> a parental solution of 5 drops of concentrated HNO<sub>3</sub> and 60ml deionized water was prepared. Then, 10 mL acetic acid was added to 10 mL tetra-*n*-butyl titanate (Ti(OC<sub>4</sub>H<sub>9</sub>)<sub>4</sub>) and the resulting solution was added drop wise into the above solution under vigorous magnetic stirring. The reaction was carried out at room temperature for 12h. The semitransparent mixture was sealed in a 100 mL Teflon-lined stainless steel autoclave after filtration, which was filled up to 80% of its total volume, then were calcined in a muffle furnace in air at 160 °C for 24 h. TiO<sub>2</sub> nanoparticles can be obtained finally after grinding.

## 2. SEM images of as-obtained FePtDy nanoalloys morphologies

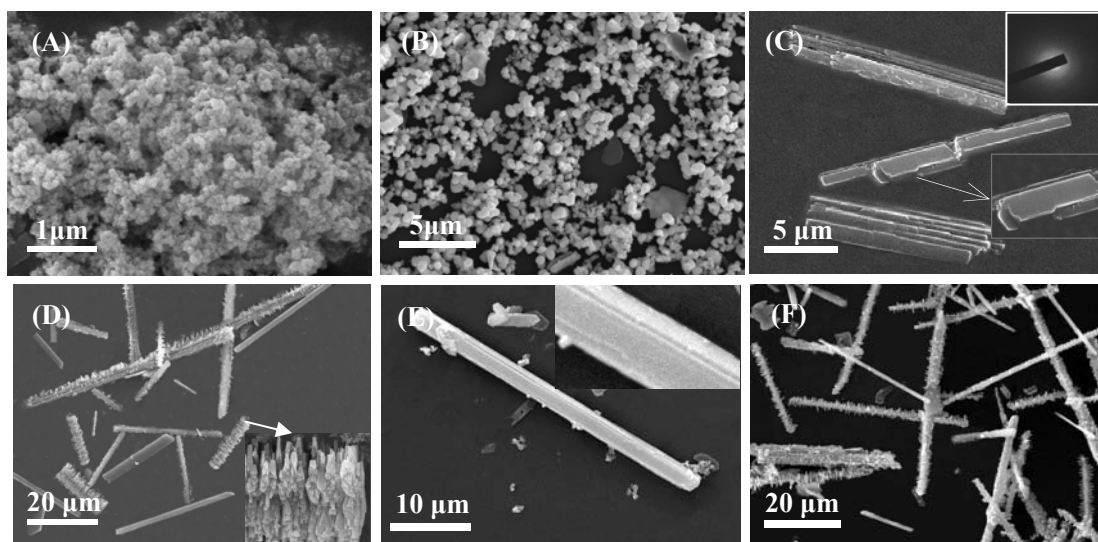

**Figure S1.** SEM images of FePtDy nanoalloys: A) Fe<sub>40</sub>Pt<sub>60</sub> nanoparticles; B) Fe<sub>40</sub>Pt<sub>58</sub>Dy<sub>2</sub> nanoparticles; C,D) nanolayers-assembled Fe<sub>38</sub>Pt<sub>58</sub>Dy<sub>4</sub> 1D superstructures; E,F) nanolayers-assembled Fe<sub>39</sub>Pt<sub>53</sub>Dy<sub>8</sub> 1D superstructures.

### 3. Enhanced effect on photocatalytic activity of TiO<sub>2</sub> by simply mixing with as-designed FePtDy nanoalloys.

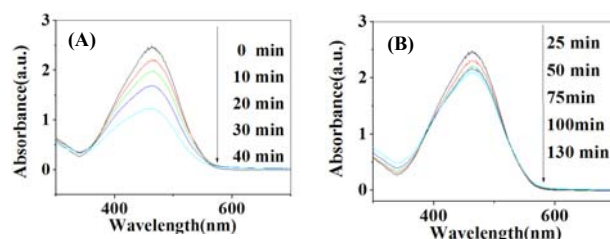

Figure S2 UV-vis absorption spectra for solution separated from p-25 TiO<sub>2</sub> nanoparticles suspensions under solar-light (A) and UV-filter visible-light (B) irradiated for various periods.

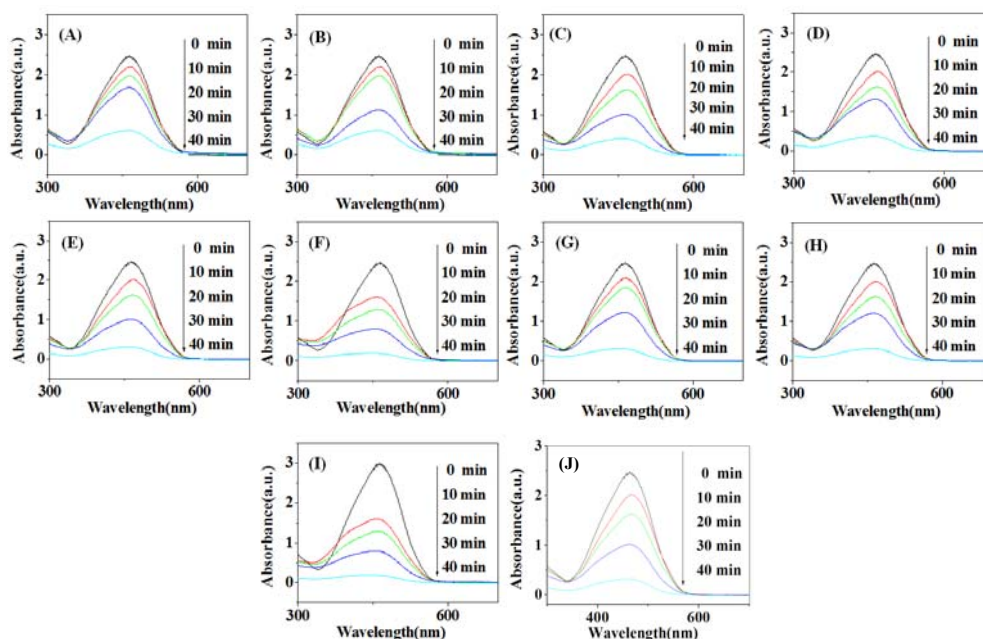

**Figure S3.** UV-vis absorption spectra for solution separated from TiO<sub>2</sub> + FePtDy nanoparticles suspensions irradiated for various periods under solar light irradiation: A) TiO<sub>2</sub>+Fe<sub>40</sub>Pt<sub>60</sub> nanoparticles; B) TiO<sub>2</sub>+Fe<sub>40</sub>Pt<sub>58</sub>Dy<sub>2</sub> nanoparticles; C) TiO<sub>2</sub>+Fe<sub>41</sub>Pt<sub>56</sub>Dy<sub>3</sub> nanoparticles; D) TiO<sub>2</sub>+Fe<sub>38</sub>Pt<sub>58</sub>Dy<sub>4</sub> nanoparticles; E) TiO<sub>2</sub>+Fe<sub>40</sub>Pt<sub>49</sub>Dy<sub>11</sub> nanoparticles; F) TiO<sub>2</sub>+Fe<sub>39</sub>Pt<sub>53</sub>Dy<sub>8</sub> nanoparticles; G) TiO<sub>2</sub>+Fe<sub>38</sub>Pt<sub>58</sub>Dy<sub>4</sub> 1D superstructures; H) TiO<sub>2</sub>+Fe<sub>40</sub>Pt<sub>49</sub>Dy<sub>11</sub> 1D superstructures; I) TiO<sub>2</sub>+Fe<sub>39</sub>Pt<sub>53</sub>Dy<sub>8</sub> 1D superstructures; J) TiO<sub>2</sub>+Pt nanoparticles

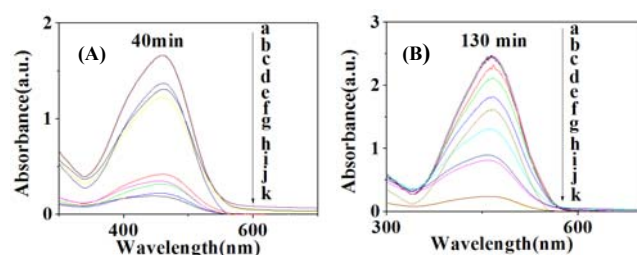

**Figure S4.** UV-vis absorption spectra under solar-light (A) and UV-filter visible-light irradiation (B): a)  $\text{Fe}_{38}\text{Pt}_{58}\text{Dy}_4$  nanoparticles; b) p-25  $\text{TiO}_2$  nanoparticles; c)  $\text{TiO}_2$  nanoparticles; d)  $\text{TiO}_2+\text{Fe}_{40}\text{Pt}_{60}$  nanoparticles; e)  $\text{TiO}_2+\text{Fe}_{40}\text{Pt}_{58}\text{Dy}_2$  nanoparticles; f)  $\text{TiO}_2+\text{Fe}_{41}\text{Pt}_{56}\text{Dy}_3$  nanoparticles; g)  $\text{TiO}_2+\text{Fe}_{38}\text{Pt}_{58}\text{Dy}_4$  nanoparticles; h)  $\text{TiO}_2+\text{Fe}_{38}\text{Pt}_{58}\text{Dy}_4$  1D superstructures; i)  $\text{TiO}_2+\text{Fe}_{40}\text{Pt}_{49}\text{Dy}_{11}$  1D superstructures; j)  $\text{TiO}_2+\text{Fe}_{39}\text{Pt}_{53}\text{Dy}_8$  1D superstructures; k)  $\text{TiO}_2+\text{Pt}$  nanoparticles.

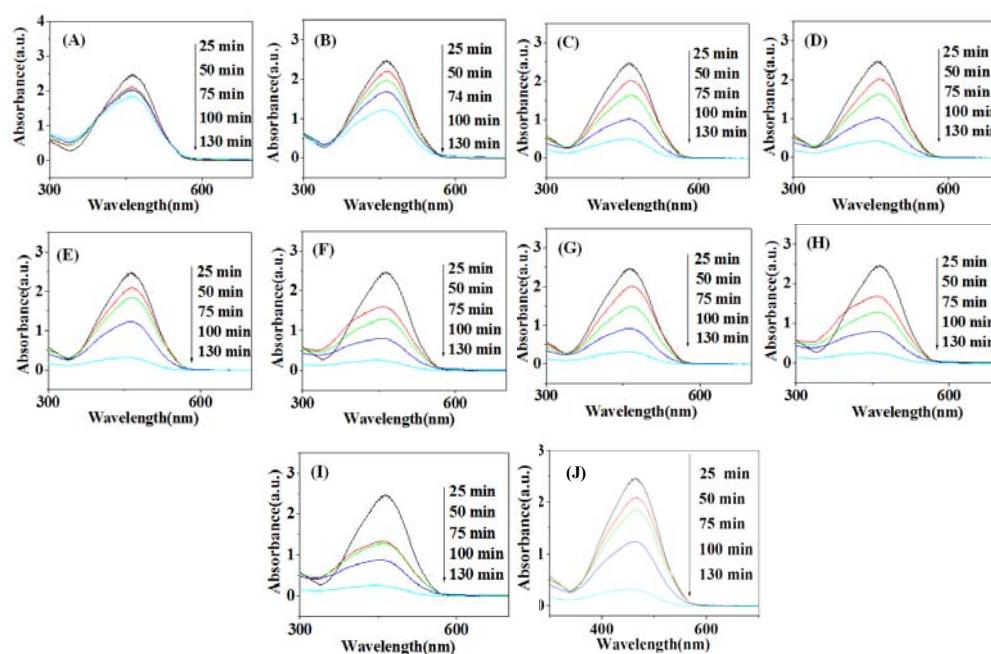

**Figure S5.** UV-vis absorption spectra for solution separated from  $\text{TiO}_2+\text{FePtDy}$  nanoparticles suspensions irradiated for various periods under UV-filter visible-light irradiation: A)  $\text{TiO}_2+\text{Fe}_{40}\text{Pt}_{60}$  nanoparticles; B)  $\text{TiO}_2+\text{Fe}_{40}\text{Pt}_{58}\text{Dy}_2$  nanoparticles; C)  $\text{TiO}_2+\text{Fe}_{41}\text{Pt}_{56}\text{Dy}_3$  nanoparticles; D)  $\text{TiO}_2+\text{Fe}_{38}\text{Pt}_{58}\text{Dy}_4$  nanoparticles; E)  $\text{TiO}_2+\text{Fe}_{40}\text{Pt}_{49}\text{Dy}_{11}$  nanoparticles; F)  $\text{TiO}_2+\text{Fe}_{39}\text{Pt}_{53}\text{Dy}_8$  nanoparticles; G)  $\text{TiO}_2+\text{Fe}_{38}\text{Pt}_{58}\text{Dy}_4$  1D superstructures; H)  $\text{TiO}_2+\text{Fe}_{40}\text{Pt}_{49}\text{Dy}_{11}$  1D superstructures; I)  $\text{TiO}_2+\text{Fe}_{39}\text{Pt}_{53}\text{Dy}_8$  1D superstructures; J)  $\text{TiO}_2+\text{Pt}$  nanoparticles
